# Supplementary material for: Seasonal variability and vertical distribution of autotrophic and heterotrophic picoplankton in the Central Red Sea
Source: PeerJ journal article supplement (doi:10.7717/peerj.8612), 2020-02-24

## Field work

Sample collection

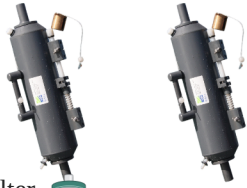

Glass fiber filter

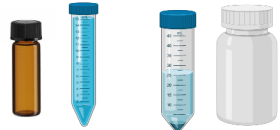

DOC

DIN

FC

Chla

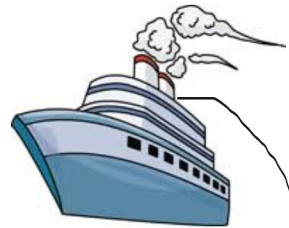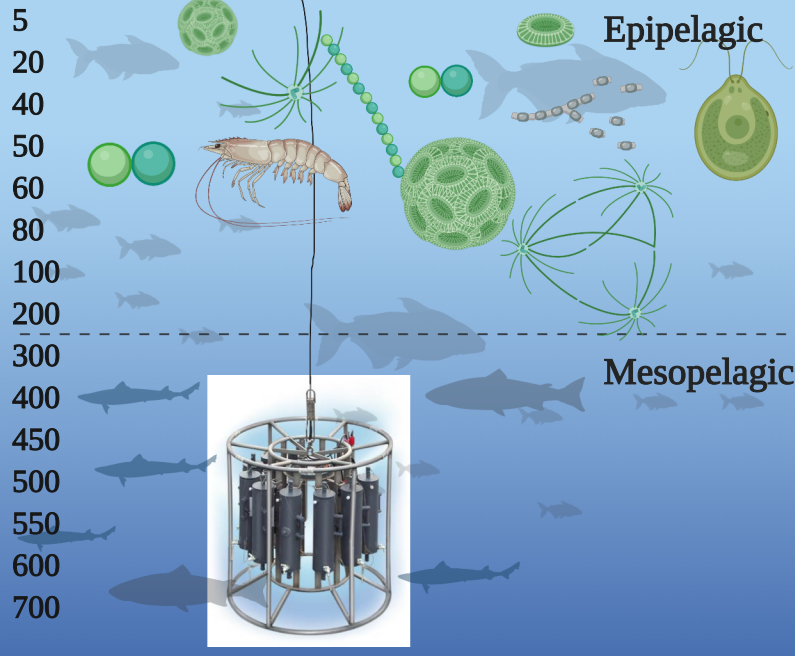

## Lab work

Flow cytometer (FC)

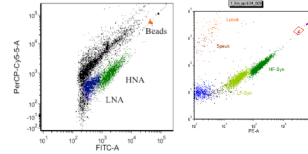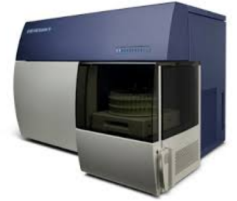

Total organic carbon  
analyzer for dissolved  
organic carbon (DOC)

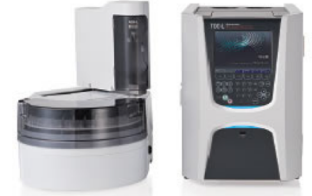

Filtration manifold for  
fractionated chlorophyll *a*  
(Chla)

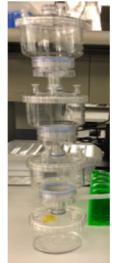

Segmented Flow Analyzer  
for inorganic nutrients  
(DIN)

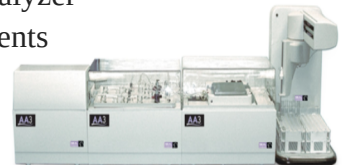

Supplement: FigureS1.pdf [file FigureS1.pdf]
